# Supplementary material for: Cerebral Perfusion Insufficiency and Relationships with Cognitive Deficits in Alzheimer’s Disease: A Multiparametric Neuroimaging Study
Source: PubMed Central journal article supplement (PMC5784155; doi:10.1038/s41598-018-19387-x), 2018-01-24
Supplement: 41598_2018_19387_MOESM1_ESM.pdf [file 41598_2018_19387_MOESM1_ESM.pdf]

## **Cerebral Perfusion Insufficiency and Relationships with Cognitive Deficits in Alzheimer's Disease: A Multiparametric Neuroimaging Study**

Chi-Wei Huang<sup>1</sup>, Shih-Wei Hsu<sup>2</sup>, Ya-Ting Chang<sup>1</sup>, Shu-Hua Huang<sup>3</sup>, Yung-Cheng Huang<sup>3</sup>, Chen-Chang Lee<sup>2</sup>, Wen-Neng Chang<sup>1</sup>, Chun-Chung Lui<sup>4</sup>, Na-Ching Chen<sup>1</sup>, Chiung-Chih Chang<sup>1</sup>

<sup>1</sup>Department of Neurology, Cognition and Aging Center, Kaohsiung Chang Gung Memorial Hospital, Chang Gung University College of Medicine, Kaohsiung, Taiwan

<sup>2</sup>Department of Radiology, Kaohsiung Chang Gung Memorial Hospital, Chang Gung University College of Medicine, Kaohsiung, Taiwan

<sup>3</sup>Department of Nuclear Medicine, Kaohsiung Chang Gung Memorial Hospital, Chang Gung University College of Medicine, Kaohsiung, Taiwan

<sup>4</sup>Department of Radiology, Division of medical imaging, E-Da Cancer Hospital and I-Shou University, Taiwan

**Correspondence to:** Chiung-Chih Chang, M.D., Ph.D.

Department of Neurology, Kaohsiung Chang Gung Memorial Hospital and Chang Gung University College of Medicine, #123, Ta-Pei Road, Niasung, Kaohsiung County 833, Taiwan

Telephone: +886-7-7317123-3389

E-mail: [neur099@adm.cgmh.org.tw](mailto:neur099@adm.cgmh.org.tw)

## Supplementary

### Relationships with total scores of CASI

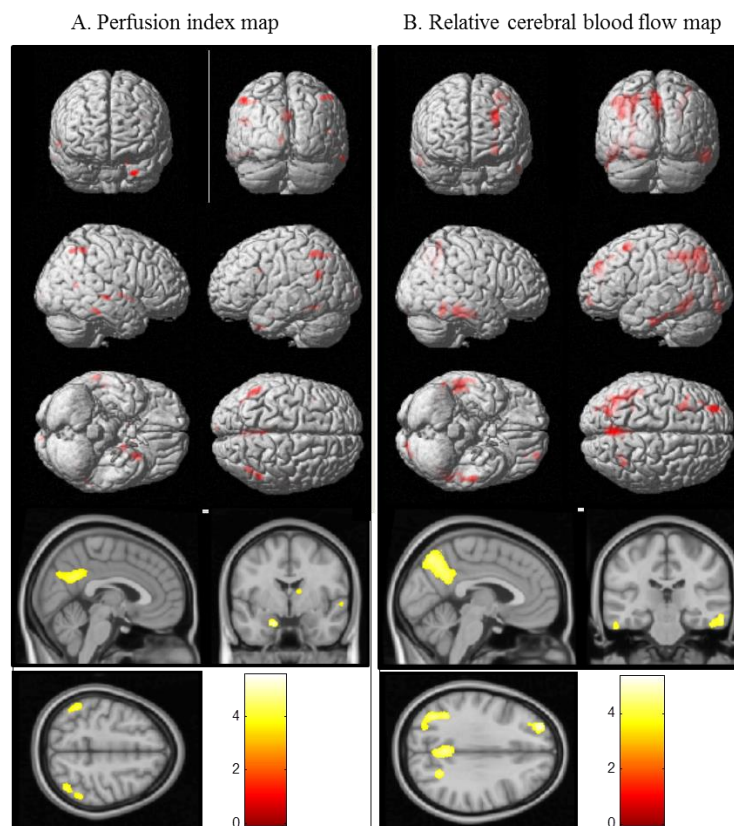

**Figure 1.** Correlation map between total scores of the Cognitive Ability Screening Instrument (CASI) and (A) perfusion index and (B) relative cerebral blood flow. The red color rendered onto the 3-dimensional brain images represents positive correlations and the intensity represents the depth from the brain surface. Representative slices with a color bar representing the range of t values are shown below. Images were statistically thresholded at  $p < 0.05$ , and a false discovery rate correction for multiple comparisons,  $\text{cluster} > 200$ .

## Relationships with short term memory scores

A. Perfusion index map

B. Relative cerebral blood flow map

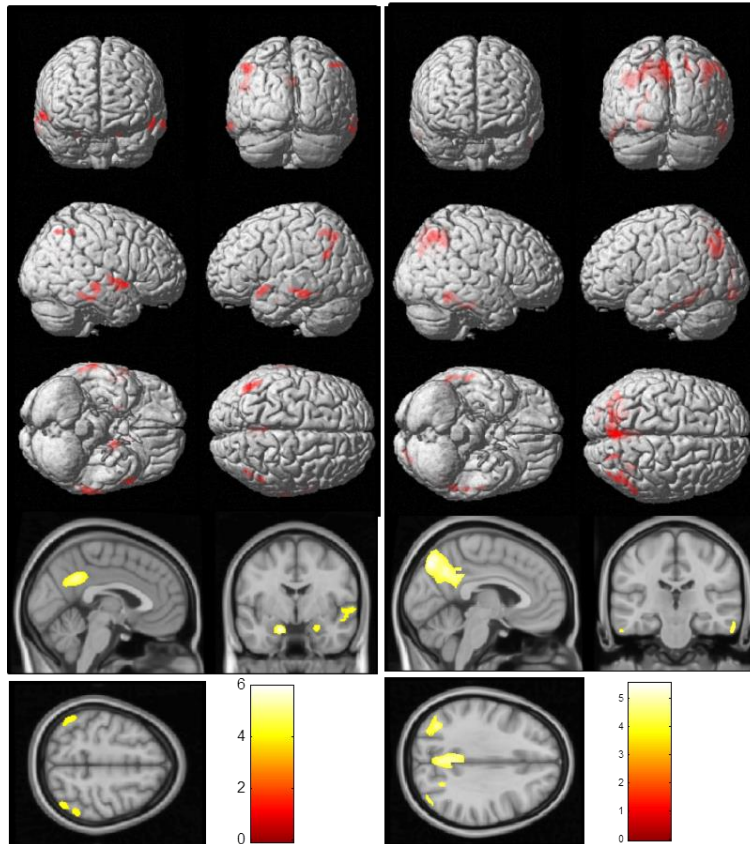

**Figure 2.** Correlation map between short-term memory scores of the Cognitive Ability Screening Instrument and (A) perfusion index and (B) relative cerebral blood flow. The red color rendered onto the 3-dimensional brain images represents positive correlations and the intensity represents the depth from the brain surface. Representative slices with a color bar representing the range of t values are shown below. Images were statistically thresholded at  $p < 0.05$ , and a false discovery rate correction for multiple comparisons,  $\text{cluster} > 200$ .

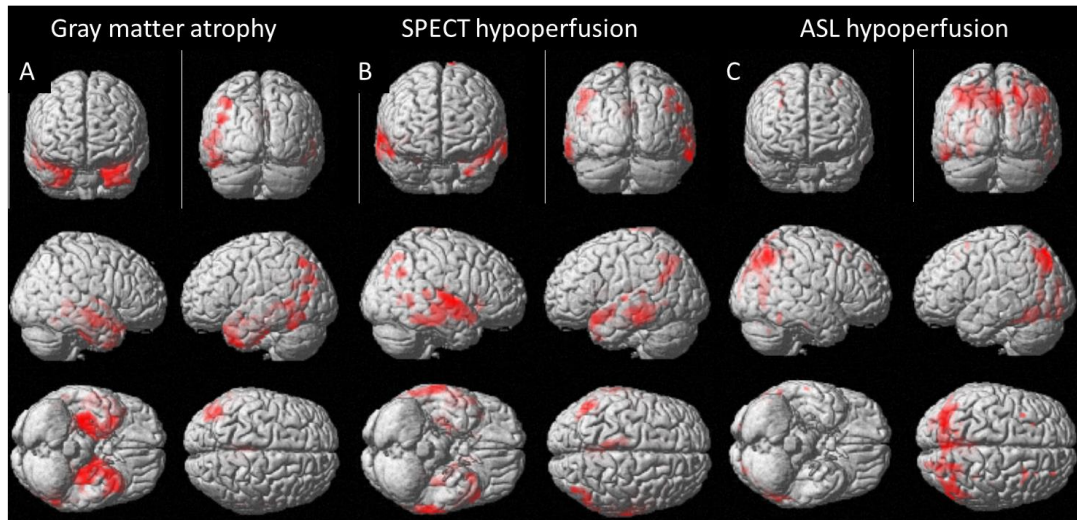

Figure 3. Voxel-wise statistical analysis using statistical nonparametric mapping (SnPM) between patients with Alzheimer's disease and controls. Areas of (A) atrophy; (B) decreased perfusion index; and (C) decreased relative cerebral blood flow in the patients. The results are similar to statistic parametric mapping (SPM) analysis. All images were statistically thresholded at  $p < 0.05$ , and a family-wise error rate correction for multiple comparison,  $\text{cluster} > 200$ . ASL=arterial spin labeling; SPECT=single-photon emission computed tomography;
